# Supplementary material
Source: publisher figshare collection journal article supplement (https://frontiersin.figshare.com/ndownloader/files/15279134)
Supplement: Supplementary file 1 [file 15279134]

## Supplementary Material for “Host plants and climate structure habitat associations of the western monarch butterfly,” by Dilts et al.

### Content included in supplementary material:

- Additional methods (description of environmental covariates)
- Additional results (background selection, parameterization, variable reduction, and model validation)
- Supplementary Tables 1-7
- Supplementary Figure 1
- Supplementary Figure 2
- Supplementary Figure 3

### **Additional methods – Detailed description of environmental covariates**

A key aspect of all species distribution models is the selection and preparation of environmental predictors that may influence the distribution of the species in question. Such variables typically include both biotic and abiotic layers such as land cover type, climatic variables, soil type, and topographic variables. We identified a set of 25 variables of potential ecological importance to milkweeds and/or monarch butterflies in the western U.S. From these, for each species, we selected a smaller subset of variables that were not correlated with each other, and used these in the final habitat suitability models (Steele et al., 2016).

Little has been published concerning environmental factors that influence the distribution of milkweeds, so most variables were selected based on expert ecological knowledge and data availability. We favored proximal variables (e.g., minimum temperature of the coldest month) rather than distal variables (e.g., elevation) that affect organisms less directly (Merow et al., 2013). The final set of candidate variables is provided in **Table 2** and is available upon request from the Xerces Society (monarchs@xerces.org). A few variables were more complex to calculate or require explanation as to their potential ecological significance, and these are described further here.

#### *Climate data (PRISM)*

Annual precipitation, maximum temperature of warmest month, mean annual temperature, mean temperature of warmest month, mean temperature of wettest month, minimum temperature of the coldest month, precipitation of coldest season, precipitation of the warmest season, temperature range were downloaded from the PRISM climate website (<http://www.prism.oregonstate.edu/normals/>). The coldest quarter was December through February and the warmest quarter was June through August. July was the warmest month and December was the coldest month.

#### *Climate data (WORLDCLIM)*

Precipitation seasonality and temperature seasonality were downloaded from the WORLDCLIM website (<http://www.worldclim.org/current>) as version 1.4.

#### *Climate data (WNA)*

Number of warming degree days was downloaded from the Climate WNS (Western North America) website (<https://sites.ualberta.ca/~ahamann/data/climatewna.html>).

#### *Actual evapotranspiration*

Stephenson (1998) defined actual evapotranspiration as “evaporative water loss from a site covered by a hypothetical standard crop, given the prevailing water availability”. This definition can be thought of as the potential for plant productivity given the simultaneous availability of both water and energy. The AET layer used in this study was developed by Dobrowski et al. (2013) and was downloaded from the AdaptWest website.

#### *Mean climatic water deficit*

Mean climatic water deficit represents the unmet atmospheric potential for evapotranspiration and can be used as a proxy for drought (Dobrowski et al., 2013). Stevens and Frey (2010) found that the Palmer Drought Severity Index is a major constraint on late-season monarch butterfly breeding distribution. Our use of mean climatic water deficit represents the hypothesis that aridity may be a major constraint on the geographic distribution of monarchs or milkweeds. CWD was downloaded from the AdaptWest website.

#### *Number of warming degree days*

Warming degree-days is a metric of heat accumulation through time that is often used in phenology analyses. Use of this metric was inspired by Stevens and Frey (2010), who included a map layer based on the minimum degree day accumulation necessary for monarch butterfly larval development for the last summer generation (August-September) to determine which areas would reliably produce the adults that migrate to the overwintering sites.

#### *Precipitation seasonality*

Precipitation seasonality is one of the original bioclimatic variables defined as used in Nix and Busby (1986) and Hijmans et al. (2005) and is defined as the coefficient of variation of monthly precipitation.

#### *Temperature seasonality*

Also an original bioclimatic variable, temperature seasonality is defined as the standard deviation of monthly temperature.

#### *Soil variables*

Percent clay, percent sand, percent silt, pH, and soil bulk density were included as candidate covariates in the models. We used the POLARIS soil dataset (Chaney et al., 2016) which is a gridded soil product that is derived from models based upon USDA SSURGO soil data. The SSURGO (Soil Survey Geographic Database) data product contains large gaps in the western U.S. making it unsuitable for regional modeling. In contrast, the STATSGO dataset (State Soil Geographic Database) is available across all of the western U.S. states but has a very large minimum mapping unit. Our use of POLARIS as the soil dataset is a change from Steele et al. (2016) who used STATSGO in their modeling effort.

### *Compound Topographic Index*

The Compound Topographic Index, sometimes also referred to as the Topographic Wetness Index, is a measure of relative soil moisture potential based upon the upslope drainage area and slope (Beven and Kirkby, 1979) and is calculated as  $\ln(\text{upslope area} / \tan(\text{slope}))$ . We calculated it using scripts from The Nature Conservancy (Evans et al., 2014) and a 90 m digital elevation model. In arid regions of the west, *A. speciosa* has been thought to be generally limited to relatively moist areas such as riparian areas or ditches.

### *Distance to water*

Like the Compound Topographic Index, distance to water was included because of the observed association of *A. speciosa* and relatively moist areas. It was calculated from the medium resolution National Hydrography Dataset (U.S. Geological Survey 2015) because this resolution is more consistent across the west than the high resolution National Hydrography Dataset and because the medium resolution data was adequate to our 270 m analytical scale. The current modeling effort differed from Steele et al. (2016) in that we considered distance to both perennial water and distance to intermittent water separately. Both datasets were constructed from the USGS National Hydrography Dataset stream data with perennial being defined using the FCode 46006. For water bodies, intermittent was defined using 39001 and 36100. Distance to perennial water was the distance to the nearest source of perennial water, either stream or polygonal water body. Distance to intermittent water was similarly constructed.

### *Reclassified LANDFIRE Existing Vegetation Type Layer (i.e. Land Cover)*

We simplified the categorical LANDFIRE layer depicting Existing Vegetation Type (LANDFIRE 2013) by cross walking it to fewer, lumped classes deemed to be of likely ecological significance for milkweeds and monarch butterflies. **Supplementary Table 3** shows which land cover types were grouped together.

### *Milkweed models as covariates for the monarch butterfly breeding model*

We used our final, calibrated milkweed habitat suitability models as inputs to the model of monarch butterfly breeding habitat suitability, along with the environmental variables listed in Table 2. Milkweed presence is a critical variable in monarch butterfly breeding habitat suitability, and the maps that we produced are the best available west-wide estimate of milkweed distribution.

### *Resolution of environmental covariates*

The native resolution of the candidate environmental rasters varied from 30 m pixels to 1 km pixels. To use MaxEnt, it was necessary to aggregate or downsample all layers until they had the same grain size. Merow et al. (2013) recommend that resolutions should be chosen that provide data from proximal rather than distal variables. In our case, we wanted to balance several factors: 1) the ecological scale of processes that determine suitability for these species, 2) the spatial accuracy of our species presence locations, 3) the native resolution of environmental variables, and 4) computational constraints (finer-grained rasters greatly increase processing time). We conducted a set of initial experiments using three different resolutions: 90 m, 270 m, and 900 m, and ultimately found that 270 m provided the best compromise between the factors. All data sets were downloaded and projected into the same geographic coordinate system. To attain a standard resolution, variables with a native resolution that was coarser than 270 m were downsampled

with the ArcMap Resample tool using the nearest neighbor setting, to avoid interpolation and false precision. Continuous rasters with a native resolution of 30 m or 90 m were aggregated to 270 m pixels using the mean value. The reclassified LANDCOVER layer was aggregated 270 m resolution using the majority option. Once all the layers were aggregated or downsampled to 270 m, we used ArcMap to snap them together and clip them to the same extent.

## REFERENCES

- Beven, K.J., & Kirkby, M.J. (1979) A physically based, variable contributing area model of basin hydrology, *Hydrological Sciences Bulletin*, 24, 43–69.
- Chaney, N.W., Wood, E.F., McBratney, A.B., Hempel, J.W., Nauman, T.W., Brungard, C.W., & Odgers, N.P. (2016) POLARIS: A 30-meter probabilistic soil series map of the contiguous United States. *Geoderma*, 274, 54-67.
- Dobrowski, S.Z., Abatzoglou, J., Swanson, A.K., Greenberg, J.A., Mynsberge, A R., Holden, Z.A., & Schwartz, M.K. (2013) The climate velocity of the contiguous United States during the 20th century. *Global Change Biology*, 19(1), 241-251.
- Evans, J.S., Oakleaf, J., Cushman, S.A., & Theobald, D. (2014) An ArcGIS Toolbox for Surface Gradient and Geomorphometric Modeling, version 2.0-0. Available: <http://evansmurphy.wix.com/evansspatial>. Accessed: 2015 Dec 2nd.
- Hijmans, R. J., Cameron, S. E., Parra, J. L., Jones, P. G., & Jarvis, A. (2005). Very high resolution interpolated climate surfaces for global land areas. *International Journal of Climatology*, 25(15), 1965-1978.
- Nix, H. A., & Busby, J. (1986). BIOCLIM, a bioclimatic analysis and prediction system. Division of Water and Land Resources: Canberra.
- Rollins, M.G. (2009) LANDFIRE: a nationally consistent vegetation, wildland fire, and fuel assessment. *International Journal of Wildland Fire*, 18(3), 235-249.
- Steele, M., Engler, J.D., Cruz, L., Jepsen, S., Black, S., Taylor, A., & Jones, A. (2016) Phase I: Western Monarch and Milkweed Habitat Suitability Modeling Project- MaxEnt Model Outputs. Available: <https://ecos.fws.gov/ServCat/Reference/Profile/56630>. Accessed: 2017 Jan 19
- Stephenson, N. (1998). Actual evapotranspiration and deficit: biologically meaningful correlates of vegetation distribution across spatial scales. *Journal of Biogeography*, 25(5), 855-870.
- Stevens, S.R., & Frey, D.F. (2010) Host plant pattern and variation in climate predict the location of natal grounds for migratory monarch butterflies in western North America. *Journal of Insect Conservation*, 14(6), 731-744.

## **Additional results – From background selection, model parameterization, variable reduction, and model validation steps**

Based upon the recommendations of Anderson and Gonzalez (2011) we chose to perform species-specific optimization of a number of parameters including background area, regularization, and feature type. Background area is important in a presence-only modeling framework like Maxent because presences are contrasted with random background points and changing the size of the background can change the outcome of the model in sometimes dramatic ways (Anderson and Raza, 2010; Merow et al., 2013). Following the approaches of VanDerWal et al. (2009) we generated models at varying buffer sizes and then following Iturbide et al. (2015) sought to determine a saturation threshold using a Michaelis-Menten function that simultaneously optimizes both model fit while minimizing the background extent. In our study, species tended to have optimal background areas that varied from 270 to 300 km buffer sizes (**Supplementary Table 1**). At small buffer sizes (e.g. 10 to 100 km), models tended to have suboptimal performance. At larger buffer sizes models performed increasingly well, but the increase in improvement for each subsequently diminished. We did not find a true plateau in AUC with increasing buffer size, which we attribute to using a randomly-withheld validation dataset. Hence we used the 95% confidence interval of the saturation level to determine our optimal buffer.

After determining an optimal background size we tuned our Maxent models assessing five different feature types (linear, linear+quadratic, linear+quadratic+product, linear+quadratic+product+threshold, hinge) and five different levels of regularization (smoothing) in a factorial manner resulting in twenty-five models per species (Anderson et al., 2000; Merow et al., 2013; Radosavljevic et al., 2014). Models were assessed using validation AUC, AUCdiff (training AUC – validation AUC), and a new metric that combines Validation AUC and AUCdiff introduced here called penalized AUC or pAUC. pAUC is defined as (validation AUC - (training AUC – validation AUC)). pAUC is based on the assumption that model overfit (as measured by AUCdiff) is equal in proportion to model fit. Hence a difference in pAUC between two models can either be driven by higher overfit or lower model fit. In contrast to approaches such as Akaike's Information Criterion and Bayesian Information Criterion there is no parameter for sample size.

Our results found that the following milkweeds had the best models *A. asperula*, *A. subulata*, *A. eriocarpa*, *A. californica*, and *A. speciosa* (**Supplementary Figure 1**). The monarch model tended to rank in the middle with decent fit and minimal overfit. On the other end of the spectrum, species such as *A. cryptoceras*, *A. incarnata*, *A. erosa*, and *A. viridiflora* had the poorest models in terms of fit and overfit. The use of pAUC further separated the better milkweed models, which tended to be built upon a greater number of training points, from the poorer performing milkweed models, which tended to have few training points, because the poorer performing models often tended to be quite overfit. When comparing best models, models that used validation AUC differed dramatically from those chosen using pAUC. When using pAUC as the criterion for selecting a model, the best model varied among a range of feature types and regularization parameters (**Supplementary Table 4**). In contrast, had validation AUC been used to select models then the outcome would have been very different with all models having a regularization of either 1 or 2 and all but two models having a regularization value of 1.

Our findings are in congruence with the many authors who have called attention to the tendency for Maxent to produce overfit models and have suggested evaluating models in a fashion that incorporates penalties for overfitting (Warren and Seifert, 2011; Merow et al., 2013; Shcheglovitova and Anderson, 2013).

Our final step in the model building process was to reduce the number of parameters in order to aid in model interpretation. We employed an iterative approach in which variables were removed if they contributed less than 3% as measured by the Maxent permutation importance or if they had a Pearson's correlation greater than 0.7 with another higher ranking variable. We initially built a model using all variables and then re-built models after removing variables that met the above criteria. We repeated this process but used 10% permutation importance as the final cutoff to ensure highly interpretable and parsimonious models. Typically, it took between one and five iterations to get to a final model (**Supplementary Table 5**).

Model overfit as measured by AUCdiff was highest for *A. cryptoceras*, *A. incarnata*, *A. tuberosa*, and *A. asperula*, all of which had AUCdiff greater than 0.05. AUCdiff was strongly correlated with sample size. pAUC, which is introduced in this paper, represents a novel method for combining validation AUC and AUCdiff into a single measure. Although pAUC is functionally related to both validation AUC and AUCdiff, when the models were ranked by validation AUC and pAUC there were important differences. pAUC ranked *A. incarnata*, *A. cryptoceras*, *A. tuberosa*, *A. cordifolia*, and *A. asperula* lower than they were ranked based on validation AUC. These were all models with small sample sizes suggesting that pAUC, by incorporating AUCdiff, accounts functionally for sample size without explicitly incorporating a sample size penalty in the way that the Akaike or Bayesian Information Criterion would (Burnham and Anderson, 2003).

## REFERENCES

- Anderson, R.P., & Gonzalez Jr, I. (2011) Species-specific tuning increases robustness to sampling bias in models of species distributions: an implementation with Maxent. *Ecological Modelling*, 222(15), 2796-2811.
- Anderson, R.P., & Raza, A. (2010) The effect of the extent of the study region on GIS models of species geographic distributions and estimates of niche evolution: preliminary tests with montane rodents (genus *Nephelomys*) in Venezuela. *Journal of Biogeography*, 37(7), 1378-1393.
- Iturbide, M., Bedia, J., Herrera, S., del Hierro, O., Pinto, M., & Gutiérrez, J.M. (2015) A framework for species distribution modelling with improved pseudo-absence generation. *Ecological Modelling*, 312, 166-174.
- Merow, C., Smith, M.J., & Silander Jr, J.A. (2013) A practical guide to MaxEnt for modeling species' distributions: what it does, and why inputs and settings matter. *Ecography*, 36(10), 1058-1069.
- Radosavljevic, A., & Anderson, R.P. (2014) Making better Maxent models of species distributions: complexity, overfitting and evaluation. *Journal of Biogeography*, 41(4), 629-643.

- Shcheglovitova, M., & Anderson, R.P. (2013) Estimating optimal complexity for ecological niche models: a jackknife approach for species with small sample sizes. *Ecological Modelling*, 269, 9-17.
- Steele, M., Engler, J.D., Cruz, L., Jepsen, S., Black, S., Taylor, A., & Jones, A. (2016) Phase I: Western Monarch and Milkweed Habitat Suitability Modeling Project- MaxEnt Model Outputs. Available: <https://ecos.fws.gov/ServCat/Reference/Profile/56630>. Accessed: 2017 Jan 19
- VanDerWal, J., Shoo, L.P., Graham, C., & Williams, S.E. (2009) Selecting pseudo-absence data for presence-only distribution modeling: how far should you stray from what you know? *Ecological Modelling*, 220(4), 589-594.
- Warren, D.L., & Seifert, S.N. (2011) Ecological niche modeling in Maxent: the importance of model complexity and the performance of model selection criteria. *Ecological Applications*, 21(2), 335-342.

**Supplementary Table 1:** Sources of the occurrence data used in the study.

| <u>Source</u>                                   | <u>Count</u> |
|-------------------------------------------------|--------------|
| Southwest Monarch Study                         | 5678         |
| Arizona State University, SEINet                | 5515         |
| United States Geological Service; BISON         | 4897         |
| Xerces Society                                  | 4732         |
| California Consortium                           | 3283         |
| U.S. Fish and Wildlife Service                  | 3114         |
| University of California, Davis                 | 1951         |
| College of Western Idaho                        | 1398         |
| iNaturalist                                     | 1341         |
| Journey North                                   | 1318         |
| Global Biodiversity Information Facility        | 937          |
| University of California, Berkley               | 739          |
| CalFlora                                        | 617          |
| Washington Department of Fish and Wildlife      | 590          |
| Idaho Department of Fish and Game               | 537          |
| Oregon State University                         | 488          |
| National Phenology Network                      | 415          |
| U.S. Forest Service                             | 410          |
| Boise Parks & Recreation                        | 314          |
| Monarch Larva Monitoring Project                | 304          |
| U.S. National Park Service                      | 293          |
| PNW Consortium                                  | 265          |
| USDA PLANTS Database                            | 257          |
| private citizens                                | 192          |
| Flickr                                          | 185          |
| University of Washington                        | 162          |
| California State University, Chico              | 154          |
| Wyoming Biodiversity Citizen Science Initiative | 78           |
| Utah State University                           | 76           |
| Iowa State University, Department of Entomology | 58           |
| Bureau of Land Management                       | 44           |
| Western Monarch listserv                        | 44           |
| Friends of Red Rock Canyon                      | 41           |
| University of British Columbia                  | 29           |
| U.S. Navy                                       | 29           |
| California Polytechnic State University         | 26           |
| University of Montana                           | 19           |
| Humble Roots Nursery                            | 17           |
| University of Arizona Herbarium                 | 16           |



|                                             |    |
|---------------------------------------------|----|
| University of Alabama                       | 12 |
| City of Eugene Parks and Open Space         | 10 |
| University of Alberta Museums               | 10 |
| University of Nevada Herbarium              | 8  |
| Rombough Biological                         | 7  |
| U.S. Bureau of Land Management              | 7  |
| Missouri Botanical Garden                   | 6  |
| State of Oregon                             | 6  |
| Washington Butterfly Association            | 5  |
| Natural Resources Conservation Service      | 4  |
| University of Connecticut                   | 3  |
| University of Kansas Biodiversity Institute | 2  |
| DPLEX listserv                              | 2  |
| The Nature Conservancy                      | 1  |

**Supplementary Table 2:** Model name, number of records prior to applying geographic thinning, number of records after applying geographic thinning, and the ratio of pre to post-thinning records. In addition to the thirteen milkweeds that were modeled there were 44 additional milkweed species in the database that were not included in the model due to small samples sizes.

| <u>Model</u>                                                                    | <u>Pre-thinning records</u> | <u>Post-thinning records</u> | <u>Ratio</u> |
|---------------------------------------------------------------------------------|-----------------------------|------------------------------|--------------|
| <i>Danaus plexippus</i> - all records                                           | 8427                        | 732                          | 11.5         |
| <i>Danaus plexippus</i> - adult records                                         | 5236                        | 924                          | 5.7          |
| <i>Danaus plexippus</i> - breeding records                                      | 1498                        | 635                          | 2.4          |
| <i>Danaus plexippus</i> - breeding records without <i>Asclepias curassavica</i> | n/a                         | 586                          |              |
| <i>Asclepias speciosa</i>                                                       | 9256                        | 1219                         | 7.6          |
| <i>Asclepias fascicularis</i>                                                   | 3260                        | 226                          | 14.4         |
| <i>Asclepias subulata</i>                                                       | 609                         | 47                           | 13.0         |
| <i>Asclepias eriocarpa</i>                                                      | 838                         | 42                           | 20.0         |
| <i>Asclepias californica</i>                                                    | 637                         | 40                           | 15.9         |
| <i>Asclepias asperula</i>                                                       | 1511                        | 39                           | 38.7         |
| <i>Asclepias tuberosa</i>                                                       | 695                         | 37                           | 18.8         |
| <i>Asclepias viridiflora</i>                                                    | 246                         | 35                           | 7.0          |
| <i>Asclepias erosa</i>                                                          | 532                         | 34                           | 15.6         |
| <i>Asclepias subverticillata</i>                                                | 1448                        | 33                           | 43.9         |
| <i>Asclepias cordifolia</i>                                                     | 758                         | 30                           | 25.3         |
| <i>Asclepias cryptoceras</i>                                                    | 640                         | 24                           | 26.7         |
| <i>Asclepias incarnata</i>                                                      | 266                         | 21                           | 12.7         |
| Species not modeled                                                             |                             |                              |              |
| <i>Asclepias involucrata</i>                                                    | 410                         |                              |              |
| <i>Asclepias linaria</i>                                                        | 386                         |                              |              |
| <i>Asclepias latifolia</i>                                                      | 378                         |                              |              |
| <i>Asclepias albicans</i>                                                       | 373                         |                              |              |
| <i>Asclepias nyctaginifolia</i>                                                 | 294                         |                              |              |
| <i>Asclepias incarnata</i>                                                      | 266                         |                              |              |
| <i>Asclepias viridiflora</i>                                                    | 246                         |                              |              |
| <i>Asclepias pumila</i>                                                         | 223                         |                              |              |
| <i>Asclepias engelmanniana</i>                                                  | 212                         |                              |              |
| <i>Asclepias curassavica</i>                                                    | 196                         |                              |              |
| <i>Asclepias vestita</i>                                                        | 175                         |                              |              |
| <i>Asclepias brachystephana</i>                                                 | 151                         |                              |              |
| <i>Asclepias macrosperma</i>                                                    | 148                         |                              |              |
| <i>Asclepias labriformis</i>                                                    | 136                         |                              |              |
| <i>Asclepias solanoana</i>                                                      | 136                         |                              |              |
| <i>Asclepias nummularia</i>                                                     | 125                         |                              |              |
| <i>Asclepias macrotis</i>                                                       | 124                         |                              |              |
| <i>Asclepias hallii</i>                                                         | 120                         |                              |              |
| <i>Asclepias uncialis</i>                                                       | 111                         |                              |              |

|                                 |    |
|---------------------------------|----|
| <i>Asclepias hypoleuca</i>      | 95 |
| <i>Asclepias elata</i>          | 85 |
| <i>Asclepias arenaria</i>       | 83 |
| <i>Asclepias lemmonii</i>       | 81 |
| <i>Asclepias verticillata</i>   | 71 |
| <i>Asclepias rusbyi</i>         | 70 |
| <i>Asclepias michauxii</i>      | 65 |
| <i>Asclepias oenotheroides</i>  | 50 |
| <i>Asclepias quinquedentata</i> | 43 |
| <i>Asclepias glaucescens</i>    | 42 |
| <i>Asclepias stenophylla</i>    | 28 |
| <i>Asclepias welshii</i>        | 24 |
| <i>Asclepias eastwoodiana</i>   | 21 |
| <i>Asclepias syriaca</i>        | 18 |
| <i>Asclepias sanjuanensis</i>   | 17 |
| <i>Asclepias cutleri</i>        | 12 |
| <i>Asclepias sperryi</i>        | 10 |
| <i>Asclepias linearis</i>       | 2  |
| <i>Asclepias ovalifolia</i>     | 2  |
| <i>Asclepias emoryi</i>         | 1  |
| <i>Asclepias lanceolata</i>     | 1  |
| <i>Asclepias purpurascens</i>   | 1  |
| <i>Asclepias scaposa</i>        | 1  |
| <i>Asclepias sullivantii</i>    | 1  |
| <i>Asclepias viridis</i>        | 1  |

**Supplementary Table 3:** Landfire land cover classes as reclassified into forty-six cover types for this study. Value refers to the value field in the Landfire dataset.

| Value | Lumped Class Name                    | Lumped ID | Value | Lumped Class Name                                   | Lumped ID |
|-------|--------------------------------------|-----------|-------|-----------------------------------------------------|-----------|
| 3969  | Agricultural-Aquaculture             | 1         | 3184  | Exotic Herbaceous                                   | 17        |
| 3989  | Agricultural-Aquaculture             | 1         | 3182  | Exotic Herbaceous-Upland                            | 18        |
| 3968  | Agricultural-Graminoid               | 2         | 3183  | Exotic Herbaceous-Upland                            | 18        |
| 3978  | Agricultural-Graminoid               | 2         | 3181  | Exotic Herbaceous-Upland                            | 18        |
| 3988  | Agricultural-Graminoid               | 2         | 3259  | Exotic Tree-Shrub                                   | 19        |
| 3966  | Agricultural-Graminoid               | 2         | 3180  | Exotic Tree-Shrub                                   | 19        |
| 3986  | Agricultural-Graminoid               | 2         | 3134  | Grassland                                           | 20        |
| 3967  | Agricultural-Graminoid               | 2         | 3142  | Grassland                                           | 20        |
| 3977  | Agricultural-Graminoid               | 2         | 3130  | Grassland                                           | 20        |
| 3987  | Agricultural-Graminoid               | 2         | 3135  | Grassland                                           | 20        |
| 3961  | Agricultural-high structure          | 3         | 3147  | Grassland                                           | 20        |
| 3981  | Agricultural-high structure          | 3         | 3503  | Grassland                                           | 20        |
| 3962  | Agricultural-high structure          | 3         | 3133  | Grassland                                           | 20        |
| 3982  | Agricultural-high structure          | 3         | 3256  | Grassland                                           | 20        |
| 3960  | Agricultural-high structure          | 3         | 3141  | Grassland                                           | 20        |
| 3980  | Agricultural-high structure          | 3         | 3132  | Grassland                                           | 20        |
| 3965  | Agricultural-Row Crop                | 4         | 3148  | Grassland                                           | 20        |
| 3975  | Agricultural-Row Crop                | 4         | 3149  | Grassland                                           | 20        |
| 3985  | Agricultural-Row Crop                | 4         | 3150  | Grassland                                           | 20        |
| 3964  | Agricultural-Row Crop                | 4         | 3195  | Grassland                                           | 20        |
| 3984  | Agricultural-Row Crop                | 4         | 3143  | Grassland-Alpine                                    | 21        |
| 3963  | Agricultural-Row Crop                | 4         | 3136  | Grassland-Alpine                                    | 21        |
| 3983  | Agricultural-Row Crop                | 4         | 3144  | Grassland-Alpine                                    | 21        |
| 3294  | Barren                               | 5         | 3171  | Grassland-Alpine                                    | 21        |
| 3260  | Deciduous closed tree canopy         | 6         | 3068  | Grassland-Alpine                                    | 21        |
| 3264  | Deciduous closed tree canopy         | 6         | 3071  | Grassland-Alpine                                    | 21        |
| 3266  | Deciduous closed tree canopy         | 6         | 3067  | Grassland-Alpine                                    | 21        |
| 3262  | Deciduous closed tree canopy         | 6         | 3070  | Grassland-Alpine                                    | 21        |
| 3009  | Deciduous open tree canopy           | 7         | 3131  | Grassland-Coastal                                   | 22        |
| 3011  | Deciduous open tree canopy           | 7         | 3129  | Grassland-Coastal                                   | 22        |
| 3012  | Deciduous open tree canopy           | 7         | 3138  | Grassland-Montane                                   | 23        |
| 3013  | Deciduous open tree canopy           | 7         | 3139  | Grassland-Montane                                   | 23        |
| 3008  | Deciduous open tree canopy           | 7         | 3146  | Grassland-Montane                                   | 23        |
| 3201  | Deciduous open tree canopy           | 7         | 3137  | Grassland-Subalpine                                 | 24        |
| 3237  | Deciduous open tree canopy-Montane   | 8         | 3145  | Grassland-Subalpine                                 | 24        |
| 3236  | Deciduous open tree canopy-Subalpine | 9         | 3140  | Grassland-Subalpine                                 | 24        |
| 3112  | Deciduous sparse tree canopy         | 10        | 3261  | Mixed evergreen-deciduous closed tree canopy        | 25        |
| 3295  | Developed                            | 11        | 3265  | Mixed evergreen-deciduous closed tree canopy        | 25        |
| 3298  | Developed                            | 11        | 3267  | Mixed evergreen-deciduous closed tree canopy        | 25        |
| 3296  | Developed                            | 11        | 3263  | Mixed evergreen-deciduous closed tree canopy        | 25        |
| 3297  | Developed                            | 11        | 3063  | Mixed evergreen-deciduous closed tree canopy        | 25        |
| 3299  | Developed                            | 11        | 3061  | Mixed evergreen-deciduous open tree canopy          | 26        |
| 3903  | Developed                            | 11        | 3062  | Mixed evergreen-deciduous open tree canopy          | 26        |
| 3908  | Developed                            | 11        | 3157  | Mixed evergreen-deciduous open tree canopy          | 26        |
| 3913  | Developed                            | 11        | 3156  | Mixed evergreen-deciduous open tree canopy-Lowland  | 27        |
| 3924  | Developed                            | 11        | 3158  | Mixed evergreen-deciduous open tree canopy-Montane  | 28        |
| 3929  | Developed                            | 11        | 3154  | Mixed evergreen-deciduous open tree canopy-Montane  | 28        |
| 3934  | Developed                            | 11        | 3159  | Mixed evergreen-deciduous open tree canopy-Montane  | 28        |
| 3904  | Developed                            | 11        | 3255  | Mixed evergreen-deciduous shrubland                 | 29        |
| 3909  | Developed                            | 11        | 3251  | Mixed evergreen-deciduous shrubland-Montane         | 30        |
| 3914  | Developed                            | 11        | 3170  | Mixed evergreen-deciduous sparse tree canopy        | 31        |
| 3923  | Developed                            | 11        | 3113  | Mixed evergreen-deciduous sparse tree canopy        | 31        |
| 3928  | Developed                            | 11        | 3118  | Mixed evergreen-deciduous sparse tree canopy        | 31        |
| 3900  | Developed                            | 11        | 3120  | Mixed evergreen-deciduous sparse tree canopy-Upland | 32        |
| 3910  | Developed                            | 11        | 3292  | Open Water                                          | 33        |
| 3920  | Developed                            | 11        | 3488  | Riparian                                            | 34        |
| 3925  | Developed                            | 11        | 3495  | Riparian                                            | 34        |
| 3940  | Developed                            | 11        | 3504  | Riparian                                            | 34        |
| 3945  | Developed                            | 11        | 3163  | Riparian                                            | 34        |
| 3901  | Developed                            | 11        | 3164  | Riparian                                            | 34        |
| 3911  | Developed                            | 11        | 3254  | Riparian                                            | 34        |
| 3921  | Developed                            | 11        | 3257  | Riparian                                            | 34        |
| 3926  | Developed                            | 11        | 3253  | Riparian                                            | 34        |
| 3941  | Developed                            | 11        | 3258  | Riparian                                            | 34        |
| 3946  | Developed                            | 11        | 3385  | Riparian                                            | 34        |
| 3902  | Developed                            | 11        | 3162  | Riparian                                            | 34        |
| 3907  | Developed                            | 11        | 3151  | Riparian                                            | 34        |
| 3912  | Developed                            | 11        | 3155  | Riparian                                            | 34        |
| 3922  | Developed                            | 11        | 3152  | Riparian-Montane                                    | 35        |
| 3927  | Developed                            | 11        | 3252  | Riparian-Subalpine                                  | 36        |
| 3942  | Developed                            | 11        | 3160  | Riparian-Subalpine                                  | 36        |
| 3947  | Developed                            | 11        | 3123  | Shrubland                                           | 37        |
| 3177  | Evergreen closed tree canopy         | 12        | 3212  | Shrubland                                           | 37        |
| 3037  | Evergreen closed tree canopy         | 12        | 3125  | Shrubland                                           | 37        |

|      |                                      |    |      |                               |    |
|------|--------------------------------------|----|------|-------------------------------|----|
| 3039 | Evergreen closed tree canopy         | 12 | 3220 | Shrubland                     | 37 |
| 3018 | Evergreen closed tree canopy         | 12 | 3080 | Shrubland                     | 37 |
| 3047 | Evergreen closed tree canopy         | 12 | 3085 | Shrubland                     | 37 |
| 3166 | Evergreen closed tree canopy         | 12 | 3210 | Shrubland                     | 37 |
| 3052 | Evergreen closed tree canopy         | 12 | 3078 | Shrubland                     | 37 |
| 3045 | Evergreen closed tree canopy         | 12 | 3105 | Shrubland                     | 37 |
| 3051 | Evergreen closed tree canopy         | 12 | 3110 | Shrubland                     | 37 |
| 3041 | Evergreen closed tree canopy         | 12 | 3097 | Shrubland                     | 37 |
| 3058 | Evergreen closed tree canopy         | 12 | 3099 | Shrubland                     | 37 |
| 3055 | Evergreen closed tree canopy         | 12 | 3103 | Shrubland                     | 37 |
| 3056 | Evergreen closed tree canopy         | 12 | 3104 | Shrubland                     | 37 |
| 3178 | Evergreen closed tree canopy         | 12 | 3108 | Shrubland                     | 37 |
| 3043 | Evergreen closed tree canopy         | 12 | 3214 | Shrubland                     | 37 |
| 3230 | Evergreen closed tree canopy         | 12 | 3215 | Shrubland                     | 37 |
| 3035 | Evergreen closed tree canopy         | 12 | 3216 | Shrubland                     | 37 |
| 3028 | Evergreen closed tree canopy         | 12 | 3101 | Shrubland                     | 37 |
| 3208 | Evergreen closed tree canopy         | 12 | 3074 | Shrubland                     | 37 |
| 3232 | Evergreen closed tree canopy         | 12 | 3087 | Shrubland                     | 37 |
| 3231 | Evergreen closed tree canopy         | 12 | 3217 | Shrubland                     | 37 |
| 3050 | Evergreen closed tree canopy         | 12 | 3065 | Shrubland                     | 37 |
| 3167 | Evergreen closed tree canopy         | 12 | 3082 | Shrubland                     | 37 |
| 3205 | Evergreen closed tree canopy         | 12 | 3127 | Shrubland                     | 37 |
| 3036 | Evergreen closed tree canopy         | 12 | 3211 | Shrubland                     | 37 |
| 3042 | Evergreen closed tree canopy         | 12 | 3090 | Shrubland                     | 37 |
| 3174 | Evergreen closed tree canopy         | 12 | 3091 | Shrubland                     | 37 |
| 3014 | Evergreen open tree canopy           | 13 | 3109 | Shrubland                     | 37 |
| 3034 | Evergreen open tree canopy           | 13 | 3100 | Shrubland                     | 37 |
| 3200 | Evergreen open tree canopy           | 13 | 3076 | Shrubland                     | 37 |
| 3060 | Evergreen open tree canopy           | 13 | 3121 | Shrubland                     | 37 |
| 3206 | Evergreen open tree canopy           | 13 | 3122 | Shrubland                     | 37 |
| 3172 | Evergreen open tree canopy           | 13 | 3153 | Shrubland                     | 37 |
| 3173 | Evergreen open tree canopy           | 13 | 3213 | Shrubland                     | 37 |
| 3027 | Evergreen open tree canopy           | 13 | 3064 | Shrubland                     | 37 |
| 3203 | Evergreen open tree canopy           | 13 | 3072 | Shrubland                     | 37 |
| 3017 | Evergreen open tree canopy           | 13 | 3079 | Shrubland                     | 37 |
| 3202 | Evergreen open tree canopy           | 13 | 3124 | Shrubland                     | 37 |
| 3023 | Evergreen open tree canopy           | 13 | 3095 | Shrubland                     | 37 |
| 3049 | Evergreen open tree canopy           | 13 | 3204 | Shrubland                     | 37 |
| 3019 | Evergreen open tree canopy           | 13 | 3250 | Shrubland                     | 37 |
| 3016 | Evergreen open tree canopy           | 13 | 3075 | Shrubland                     | 37 |
| 3025 | Evergreen open tree canopy           | 13 | 3081 | Shrubland                     | 37 |
| 3059 | Evergreen open tree canopy           | 13 | 3088 | Shrubland                     | 37 |
| 3053 | Evergreen open tree canopy           | 13 | 3066 | Shrubland                     | 37 |
| 3054 | Evergreen open tree canopy           | 13 | 3093 | Shrubland                     | 37 |
| 3179 | Evergreen open tree canopy           | 13 | 3094 | Shrubland                     | 37 |
| 3032 | Evergreen open tree canopy           | 13 | 3077 | Shrubland                     | 37 |
| 3048 | Evergreen open tree canopy           | 13 | 3096 | Shrubland-Coastal             | 38 |
| 3161 | Evergreen open tree canopy           | 13 | 3128 | Shrubland-Coastal             | 38 |
| 3029 | Evergreen open tree canopy           | 13 | 3092 | Shrubland-Coastal             | 38 |
| 3030 | Evergreen open tree canopy-Montane   | 14 | 3107 | Shrubland-Montane             | 39 |
| 3114 | Evergreen open tree canopy-Montane   | 14 | 3126 | Shrubland-Montane             | 39 |
| 3024 | Evergreen open tree canopy-Montane   | 14 | 3098 | Shrubland-Montane             | 39 |
| 3026 | Evergreen open tree canopy-Montane   | 14 | 3168 | Shrubland-Montane             | 39 |
| 3227 | Evergreen open tree canopy-Montane   | 14 | 3083 | Shrubland-Montane             | 39 |
| 3234 | Evergreen open tree canopy-Montane   | 14 | 3084 | Shrubland-Montane             | 39 |
| 3235 | Evergreen open tree canopy-Montane   | 14 | 3086 | Shrubland-Montane             | 39 |
| 3031 | Evergreen open tree canopy-Montane   | 14 | 3106 | Shrubland-Montane             | 39 |
| 3228 | Evergreen open tree canopy-Montane   | 14 | 3169 | Shrubland-Subalpine           | 40 |
| 3021 | Evergreen open tree canopy-Montane   | 14 | 3186 | Shrubland-Upland              | 41 |
| 3022 | Evergreen open tree canopy-Montane   | 14 | 3293 | Snow-Ice                      | 42 |
| 3233 | Evergreen open tree canopy-Subalpine | 15 | 3001 | Sparsely Vegetated            | 43 |
| 3020 | Evergreen open tree canopy-Subalpine | 15 | 3002 | Sparsely Vegetated            | 43 |
| 3057 | Evergreen open tree canopy-Subalpine | 15 | 3003 | Sparsely Vegetated            | 43 |
| 3038 | Evergreen open tree canopy-Subalpine | 15 | 3004 | Sparsely Vegetated            | 43 |
| 3044 | Evergreen open tree canopy-Subalpine | 15 | 3007 | Sparsely Vegetated            | 43 |
| 3015 | Evergreen open tree canopy-Subalpine | 15 | 3218 | Sparsely Vegetated            | 43 |
| 3046 | Evergreen open tree canopy-Subalpine | 15 | 3219 | Sparsely Vegetated            | 43 |
| 3229 | Evergreen open tree canopy-Subalpine | 15 | 3221 | Sparsely Vegetated            | 43 |
| 3033 | Evergreen open tree canopy-Subalpine | 15 | 3223 | Sparsely Vegetated            | 43 |
| 3165 | Evergreen sparse tree canopy         | 16 | 3006 | Sparsely Vegetated-Alpine     | 44 |
| 3115 | Evergreen sparse tree canopy         | 16 | 3222 | Sparsely Vegetated-Alpine     | 44 |
| 3119 | Evergreen sparse tree canopy         | 16 | 3944 | Undeveloped Ruderal Grassland | 45 |
| 3116 | Evergreen sparse tree canopy         | 16 | 3949 | Undeveloped Ruderal Grassland | 45 |
| 3117 | Evergreen sparse tree canopy         | 16 | 3943 | Undeveloped Ruderal Shrubland | 46 |
|      |                                      |    | 3948 | Undeveloped Ruderal Shrubland | 46 |

**Supplementary Table 4:** Optimal buffer distance derived from the Michaelis-Menten function.

| <b>Species</b>           | <b>Buffer Distance (km)</b> | <b>AUC</b> |
|--------------------------|-----------------------------|------------|
| <i>A.subverticillata</i> | 170                         | 0.848      |
| <i>A.asperula</i>        | 180                         | 0.962      |
| <i>A.incarnata</i>       | 190                         | 0.843      |
| <i>A.cryptoceras</i>     | 200                         | 0.838      |
| <i>A.erosa</i>           | 210                         | 0.801      |
| <i>A.viridiflora</i>     | 240                         | 0.904      |
| <i>A.cordifolia</i>      | 250                         | 0.889      |
| <i>A.eriocarpa</i>       | 270                         | 0.944      |
| <i>A.californica</i>     | 270                         | 0.828      |
| <i>A.fascicularis</i>    | 280                         | 0.917      |
| <i>A.subulata</i>        | 300                         | 0.947      |
| <i>A.tuberosa</i>        | 300                         | 0.921      |

**Supplementary Table 5:** Feature type and regularization parameters of the highest penalized AUC model and model with the highest validation AUC. Feature types are (L = linear, LQ = linear+quadratic, LQP = linear+quadratic+product, LQPT = linear+quadratic+product\_threshold, H = hinge)

| <u>Model</u>                                                    | <u>pAUC type</u> | <u>pAUC reg.</u> | <u>vAUC type</u> | <u>vAUC reg.</u> |
|-----------------------------------------------------------------|------------------|------------------|------------------|------------------|
| <i>Danaus plexippus</i> – all                                   | LQP              | 2                | LQPT             | 1                |
| <i>Danaus plexippus</i> – adults                                | LQPT             | 5                | LQPT             | 1                |
| <i>Danaus plexippus</i> – breeding                              | H                | 5                | LQPT             | 1                |
| <i>Danaus plexippus</i> – breeding w/o<br><i>A. curassavica</i> | LQPT             | 4                | LQPT             | 1                |
| <i>Asclepias speciosa</i>                                       | H                | 3                | H                | 1                |
| <i>Asclepias fascicularis</i>                                   | LQP              | 5                | H                | 1                |
| <i>Asclepias subulata</i>                                       | H                | 5                | LQPT             | 2                |
| <i>Asclepias eriocarpa</i>                                      | LQP              | 1                | LQP              | 1                |
| <i>Asclepias californica</i>                                    | H                | 4                | H                | 1                |
| <i>Asclepias asperula</i>                                       | LQPT             | 1                | LQPT             | 1                |
| <i>Asclepias tuberosa</i>                                       | LQP              | 2                | LQPT             | 1                |
| <i>Asclepias viridiflora</i>                                    | LQP              | 1                | LQPT             | 1                |
| <i>Asclepias erosa</i>                                          | LQP              | 2                | H                | 1                |
| <i>Asclepias subverticillata</i>                                | H                | 1                | H                | 1                |
| <i>Asclepias cordifolia</i>                                     | H                | 3                | LQPT             | 1                |
| <i>Asclepias cryptoceras</i>                                    | H                | 1                | H                | 1                |
| <i>Asclepias incarnata</i>                                      | H                | 2                | H                | 2                |

[illegible]



**Supplementary Table 7:** Equal specificity vs. sensitivity threshold obtained from validation data for dividing relative habitat suitability maps into binary suitable and non-suitable areas.

|                                                                 |      |
|-----------------------------------------------------------------|------|
| <i>Danaus plexippus</i> – all records                           | 0.35 |
| <i>Danaus plexippus</i> – adults only                           | 0.34 |
| <i>Danaus plexippus</i> – breeding only                         | 0.33 |
| <i>Danaus plexippus</i> – breeding w/o<br><i>A. curassavica</i> | 0.34 |
| <i>Asclepias speciosa</i>                                       | 0.39 |
| <i>Asclepias fascicularis</i>                                   | 0.40 |
| <i>Asclepias subulata</i>                                       | 0.50 |
| <i>Asclepias eriocarpa</i>                                      | 0.58 |
| <i>Asclepias californica</i>                                    | 0.56 |
| <i>Asclepias asperula</i>                                       | 0.42 |
| <i>Asclepias tuberosa</i>                                       | 0.32 |
| <i>Asclepias viridiflora</i>                                    | 0.54 |
| <i>Asclepias erosa</i>                                          | 0.50 |
| <i>Asclepias subverticillata</i>                                | 0.54 |
| <i>Asclepias cordifolia</i>                                     | 0.54 |
| <i>Asclepias cryptoceras</i>                                    | 0.27 |
| <i>Asclepias incarnata</i>                                      | 0.26 |
